# Supplementary material for: Identification of Novel Substrates for cGMP Dependent Protein Kinase (PKG) through Kinase Activity Profiling to Understand Its Putative Role in Inherited Retinal Degeneration
Source: PubMed Central journal article supplement (PMC7865299; doi:10.3390/ijms22031180), 2021-01-25
Supplement: ijms-22-01180-s001.pdf [file ijms-22-01180-s001.pdf]

# Identification of novel substrates for cGMP dependent protein kinase (PKG) through kinase activity profiling to understand its putative role in inherited retinal degeneration

Akanksha Roy <sup>1,2,\*</sup>, John Groten <sup>1,2</sup>, Valeria Marigo <sup>3,4</sup>, Tushar Tomar <sup>2</sup> and Riet Hilhorst <sup>2</sup>

<sup>1</sup> Division of Toxicology, Wageningen University and Research, Stippeneng 4, 6708 WE Wageningen, The Netherlands; jgroten@pamgene.com

<sup>2</sup> PamGene International B.V., P.O. Box 1345, 5200 BJ 's-Hertogenbosch, The Netherlands; TTomar@pamgene.com (T.T.); rhilhorst@pamgene.com (R.H.)

<sup>3</sup> Department of Life Sciences, University of Modena and Reggio Emilia, via Campi, 287, 41125 Modena, Italy; vmarigo@unimore.it

<sup>4</sup> Center for Neuroscience and Neurotechnology, University of Modena and Reggio Emilia, via Campi, 287, 41125 Modena, Italy

\* Correspondence: akanksha.roy@wur.nl

## Supplementary Fig. S1

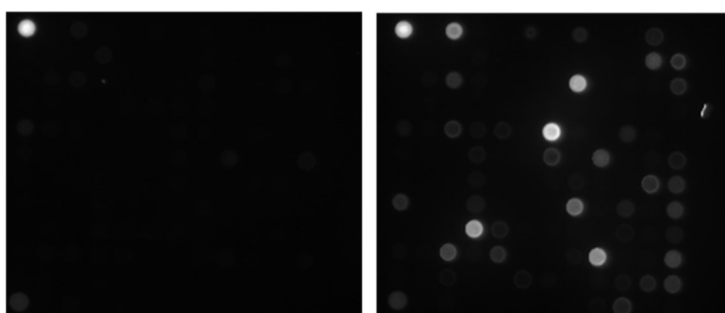

**Figure S1.** Phosphorylation of peptide microarray by PKGI as function of ATP and cGMP. ATP (0 μM, left and 400 μM, right) and cGMP (0 μM, left and 400 μM, right).

**Supplementary Table S1-** Relative signal intensity of peptide substrates as function of enzyme (PKGI or PKGII) concentration

| PKGI (ng/array) | F263_454_466 | VASP_232_244 |
|-----------------|--------------|--------------|
| 0.5             | 100          | 100          |
| 1               | 170          | 217          |
| 2.5             | 275          | 282          |
| 5               | 297          | 323          |

  

| PKGII (ng/array) | F263_454_466 | VASP_232_244 |
|------------------|--------------|--------------|
| 5                | 100          | 100          |
| 10               | 186          | 122          |
| 20               | 321          | 141          |
| 30               | 134          | 75           |

Supplementary Fig. S2

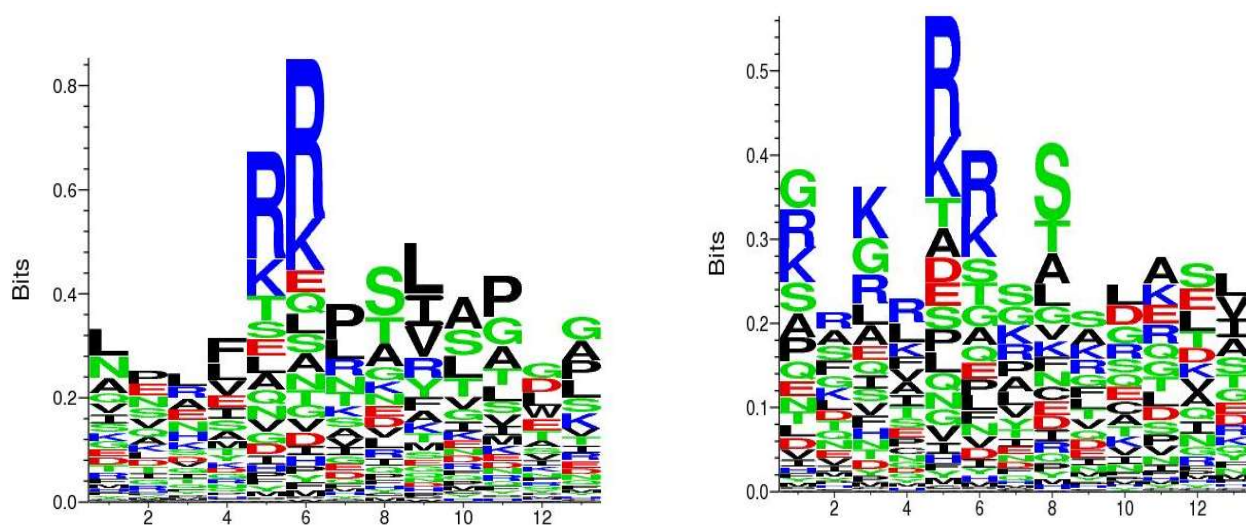

Figure S2. Substrate Logo of PKGI (left) and PKGII (right).

Supplementary Table S2- List of PKA substrates

|                 | PKA Relative Signal Intensity |
|-----------------|-------------------------------|
| CFTR_761_773    | 100                           |
| F263_454_466    | 63                            |
| KCNA6_504_516   | 51                            |
| GBRB2_427_439   | 46                            |
| MYPC3_268_280   | 43                            |
| GRIK2_708_720   | 41                            |
| KAP3_107_119    | 36                            |
| TOP2A_1463_1475 | 29                            |
| VTNC_390_402    | 27                            |
| TY3H_65_77      | 26                            |
| STK6_283_295    | 20                            |
| CFTR_730_742    | 18                            |
| NCF1_296_308    | 17                            |
| CDN1A_139_151   | 16                            |
| RS6_228_240     | 16                            |
| SCN7A_898_910   | 16                            |
| CAC1C_1974_1986 | 15                            |
| PTN12_32_44     | 14                            |
| KAP2_92_104     | 13                            |
| KPB1_1011_1023  | 13                            |
| VASP_150_162    | 12                            |
| ADRB2_338_350   | 10                            |

Supplementary Fig. S3

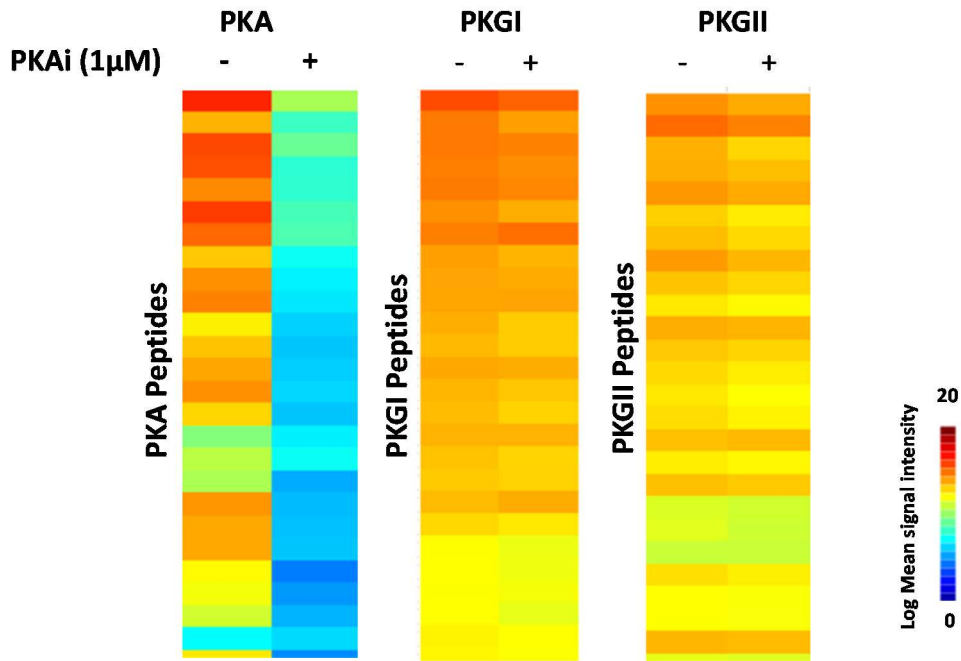

Figure S3. Effect of PKAi on activity of recombinant PKA, PKGI and PKGII.

#### Supplementary Table S3 PKGI and PKGII substrate scoring

All the experiments were performed on PamChip® 96 plate. The PamChip® 96 contains 96 identical arrays grouped on 24 strips each containing 4 arrays. Every array consists of 142 serine/threonine containing peptides. To minimize the variation between experiments performed on different days and on different PamChip® 96 plates, the experiment setup comprised of a control on each strip with variable concentrations of the modulators on the remaining three arrays of every strip. The effect of modulators was analyzed within each strip and paired with One-Way ANOVA. First, the peptides were selected for ATP dependency. Only the peptides that showed significant increase in phosphorylation with ATP were included in the scoring. The scoring of the peptides for PKGI or PKGII was based on the following parameters with 1 point assigned for every condition met (p value  $\leq 0.05$  for all the conditions, Log fold change  $> +2$  for cGMP or cAMP,  $> +0.5$  for PKG activator and  $> -0.5$  for PKG Inhibitors, and  $EC_{50}$  fit  $R^2 > 0.8$ ). For PKGI, the inhibitor Rp-8-Br-PET-cGMPS which is more specific for PKGI was used and for PKGII, the Rp-8-pCPT-cGMPS inhibitor was used.

|                   | p value | Log fold change | $EC_{50}$ fit |
|-------------------|---------|-----------------|---------------|
| cGMP              | 1       | 1               | 1             |
| cAMP              | 1       | 1               | 1             |
| 8-Br-cGMP         | 1       | 1               |               |
| Rp-8-Br-PET-cGMPS | 1       | 1               |               |
| Rp-8-pCPT-cGMPS   | 1       | 1               |               |
